# Supplementary material for: Ammonia-modified Co(ii) sites in zeolites: IR spectroscopy and spin-resolved charge transfer analysis of NO adsorption complexes
Source: Royal Society of Chemistry journal article supplement (doi:10.1039/c4cp03350g), 2014-01-01
Supplement: c4cp03350g1.pdf [file c4cp03350g1.pdf]

**Electronic supplementary information for:**

**Ammonia-modified Co(II) sites in zeolites: IR spectroscopy and spin-resolved charge transfer analysis for NO adsorption complexes**

Kinga Góra-Marek<sup>1</sup>, Adam Stępniewski<sup>2</sup>, Mariusz Radoń<sup>1</sup> and Ewa Broclawik<sup>2</sup>

<sup>1</sup> *Faculty of Chemistry, Jagiellonian University in Kraków, Ingardena 3, 30-060 Krakow, Poland*

<sup>2</sup> *Jerzy Haber Institute of Catalysis PAS, Niezapominajek 8, 30-239 Krakow, Poland*

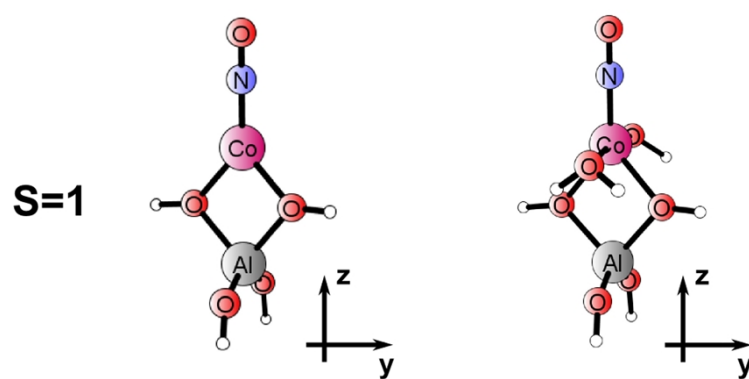

Fig. S1. Optimized geometry of [T1Co(NO)]<sup>+</sup> (left) and [T1Co(H<sub>2</sub>O)<sub>2</sub>(NO)]<sup>+</sup> (right)

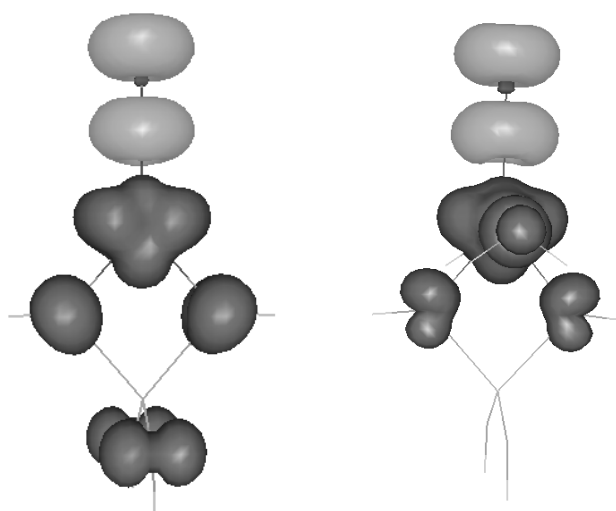

Fig. S2. Spin densities for triplet complexes [T1Co(NO)]<sup>+</sup> (left) and [T1Co(H<sub>2</sub>O)<sub>2</sub>(NO)]<sup>+</sup> (right)

Table S1. The comparison of calculated charge and spin densities of [T1Co(NO)]<sup>+</sup> and [T1Co(H<sub>2</sub>O)<sub>2</sub>(NO)]<sup>+</sup> models

| Model                                                   | <b>Q<sup>NO a)</sup></b> |           |                       |                       | <b>ρ<sub>S</sub><sup>NO a)</sup></b> |           |                       |                       |
|---------------------------------------------------------|--------------------------|-----------|-----------------------|-----------------------|--------------------------------------|-----------|-----------------------|-----------------------|
|                                                         | <b>NO</b>                | <b>Co</b> | <b>O<sup>b)</sup></b> | <b>O<sup>c)</sup></b> | <b>NO</b>                            | <b>Co</b> | <b>O<sup>b)</sup></b> | <b>O<sup>c)</sup></b> |
| [T1Co(NO)] <sup>+</sup>                                 | 0.21                     | 0.70      | -0.54                 | —                     | 0.40                                 | 2.00      | 0.11                  | —                     |
| [T1Co(H <sub>2</sub> O) <sub>2</sub> (NO)] <sup>+</sup> | 0.22                     | 0.55      | -0.55                 | -0.51                 | 0.43                                 | 2.19      | 0.04                  | 0.07                  |

a) from Mulliken population analysis

b) oxygen atom from Co-O-Al unit

c) oxygen atom from water molecule

Table S2. Geometric parameters calculated for studied systems (*available experimental values for pentaaminenitrosylcobalt(II) complex<sup>g)</sup> in italics*)

| Model                                      | [T1Co(NO)] <sup>+</sup> | [T1Co(H <sub>2</sub> O) <sub>2</sub> (NO)] <sup>+</sup> | [T1Co(NH <sub>3</sub> ) <sub>3</sub> (NO)] <sup>+</sup> |                    | [Co(NH <sub>3</sub> ) <sub>5</sub> (NO)] <sup>2+</sup> |
|--------------------------------------------|-------------------------|---------------------------------------------------------|---------------------------------------------------------|--------------------|--------------------------------------------------------|
|                                            | —                       | (a)                                                     | (b <sub>S</sub> )                                       | (b <sub>T</sub> )  | (c)                                                    |
| $\alpha_{\text{Co-N-O}}/\text{deg}$        | 180                     | 180                                                     | 122                                                     | 148                | 123 ( <i>119</i> )                                     |
| $\alpha_{\text{Al-Co-N}}/\text{deg}$       | 180                     | 180                                                     | 129                                                     | 142                | —                                                      |
| $d_{\text{Co-NO}}/\text{\AA}$              | 1.67                    | 1.69                                                    | 1.79                                                    | 1.70               | 1.84 ( <i>1.87</i> )                                   |
| $d_{\text{N-O}}/\text{\AA}$                | 1.14                    | 1.14                                                    | 1.19                                                    | 1.16               | 1.17 ( <i>1.15</i> )                                   |
| $d_{\text{Co-NH}_3}/\text{\AA}$            | —                       | —                                                       | 2 <sup>a)</sup>                                         | 2.15 <sup>a)</sup> | 2.03 <sup>c)</sup> ( <i>1.98</i> )                     |
|                                            |                         |                                                         | 2 <sup>b)</sup>                                         | 2.19 <sup>b)</sup> | 2.40 <sup>d)</sup> ( <i>2.22</i> )                     |
| $d_{\text{Co-O(H}_2\text{O)}}/\text{\AA}$  | —                       | 2.19                                                    | —                                                       | —                  | —                                                      |
|                                            |                         |                                                         | —                                                       | —                  |                                                        |
| $d_{\text{Co-O}}/\text{\AA}$ <sup>e)</sup> | 1.88                    | 1.97                                                    | 1.94                                                    | 2.03               | —                                                      |
|                                            |                         |                                                         | 2.20                                                    | 2.12               |                                                        |
| $d_{\text{Al-O}}/\text{\AA}$ <sup>e)</sup> | 1.88                    | 1.86                                                    | 1.82                                                    | 1.81               | —                                                      |
|                                            |                         |                                                         | 1.85                                                    | 1.84               |                                                        |
| $d_{\text{Al-O}}/\text{\AA}$ <sup>f)</sup> | 1.70                    | 1.71                                                    | 1.72                                                    | 1.72               | —                                                      |

a) in plane of Co-O-Al-O motif

b) out of plane of Co-O-Al-O motif

c) average equatorial C-NH<sub>3</sub> bond

d) axial C-NH<sub>3</sub> bond

e) oxygen atom from Co-O-Al unit

f) peripheral oxygen atom

g) after C.S. Pratt, B.A. Coyle, .J.A. Ibers, J. Chem. Soc. (A), 1971, 2146.

Table S3. Comparison of relative energy calculated by various exchange-correlation functionals for singlet (**b<sub>S</sub>**) and triplet (**b<sub>T</sub>**) of [T1Co(NH<sub>3</sub>)<sub>3</sub>(NO)]<sup>+</sup>

| <b>Functional</b> | <b>Relative energy (kcal/mol)</b> |                        |
|-------------------|-----------------------------------|------------------------|
|                   | <b>(b<sub>S</sub>)</b>            | <b>(b<sub>T</sub>)</b> |
| <b>BP86</b>       | 0                                 | 5.2                    |
| <b>PBE</b>        | 0                                 | 5.0                    |
| <b>B3LYP</b>      | 3.3                               | 0                      |
| <b>PBE0</b>       | 7.0                               | 0                      |
| <b>TPSSh</b>      | 0                                 | 1.9                    |
